# Supplementary material for: Bio-Guided Isolation of Methanol-Soluble Metabolites of Common Spruce (Picea abies) Bark by-Products and Investigation of Their Dermo-Cosmetic Properties
Source: PubMed Central journal article supplement (PMC6272914; doi:10.3390/molecules21111586), 2016-11-21
Supplement: molecules-21-01586-s001.pdf [file molecules-21-01586-s001.pdf]

# Supplementary Materials: Bio-Guided Isolation of Methanol Soluble Metabolites of Common Spruce (*Picea abies*) Bark by-Products and Investigation of Their Dermo-Cosmetic Properties

Apostolis Angelis, Jane Hubert, Nektarios Aligiannis, Rozalia Michalea, Amin Abedini, Jean-Marc Nuzillard, Sophie C. Gangloff, Alexios-Leandros Skaltsounis and Jean-Hugues Renault

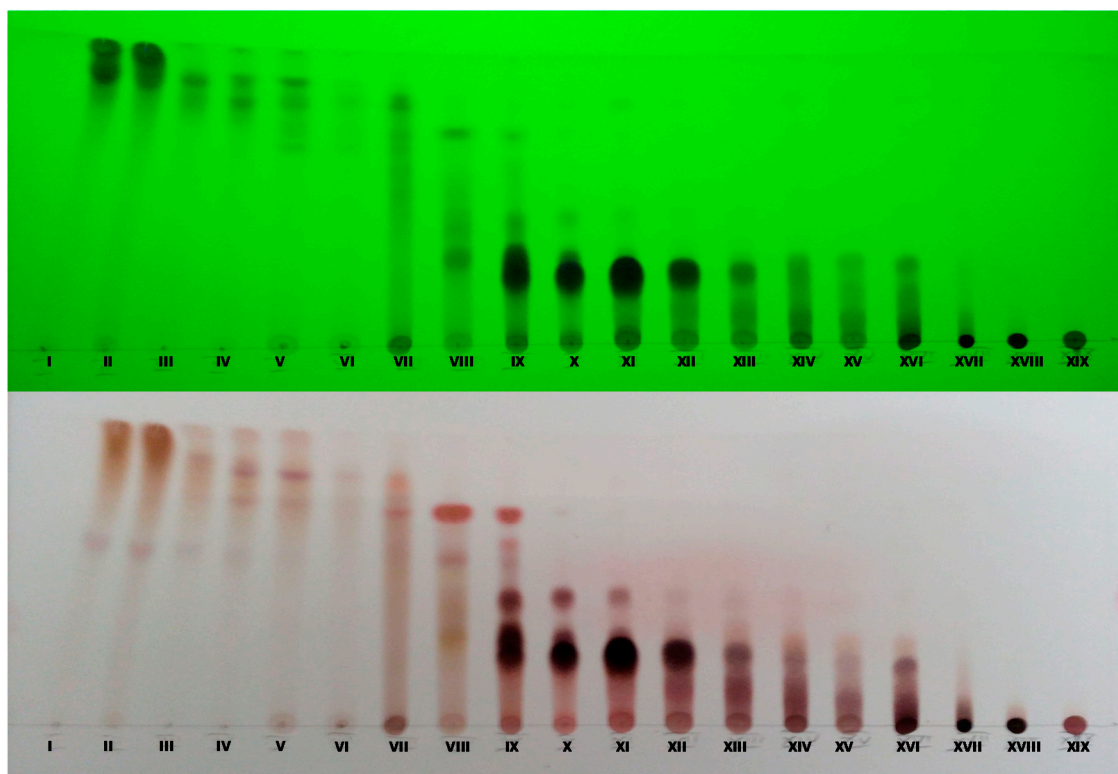

**Figure S1.** TLC chromatogram of the compared CPC fractions under UV lamb (254 nm **top**) and after spray with vanillin/H<sub>2</sub>SO<sub>4</sub>/MeOH solution and heating (**below**).

**Table S1.** The weights and chemical composition of CPC fractions of *P. abies* bark extract.

| Fractions | Weight (mg) | Chemical Composition     | Fractions | Weight (mg) | Chemical Composition           |
|-----------|-------------|--------------------------|-----------|-------------|--------------------------------|
| I         | 65          | Comp1/FC                 | XI        | 420         | Comp8(M)/Comp9                 |
| II        | 210         | Comp1/FC                 | XII       | 90          | Comp8(M)/Comp9                 |
| III       | 10          | Comp2/AD/FC              | XIII      | 75          | Comp8/Comp 9/Comp 10           |
| IV        | 10          | Comp2/Comp3/UFA          | XIV       | 45          | Comp10/Comp 11/Comp 12         |
| V         | 13          | Comp3/ UFA               | XV        | 40          | Comp10/Comp 11/Comp 12/Comp 13 |
| VI        | 18          | UFA                      | XVI       | 120         | Comp 12/Comp13/Comp14/Tannins  |
| VII       | 80          | Comp4 (M)/ Comp5/MC      | XVII      | 900         | Comp14/Tannins(M)              |
| VIII      | 90          | Comp4/Comp5 (M)/MC       | XVIII     | 300         | Comp14 + Tannins(M)            |
| IX        | 225         | Comp6/ Comp7/ Comp8      | XIX       | 30          | Tannins                        |
| X         | 425         | Comp7/Comp8(M)<br>/Comp9 |           |             |                                |

FC = Fatty compounds, AD = Abietane diterpenes, UFA = Unsaturated Fatty Acid, MC = Minor Compounds, (M) = major compound.

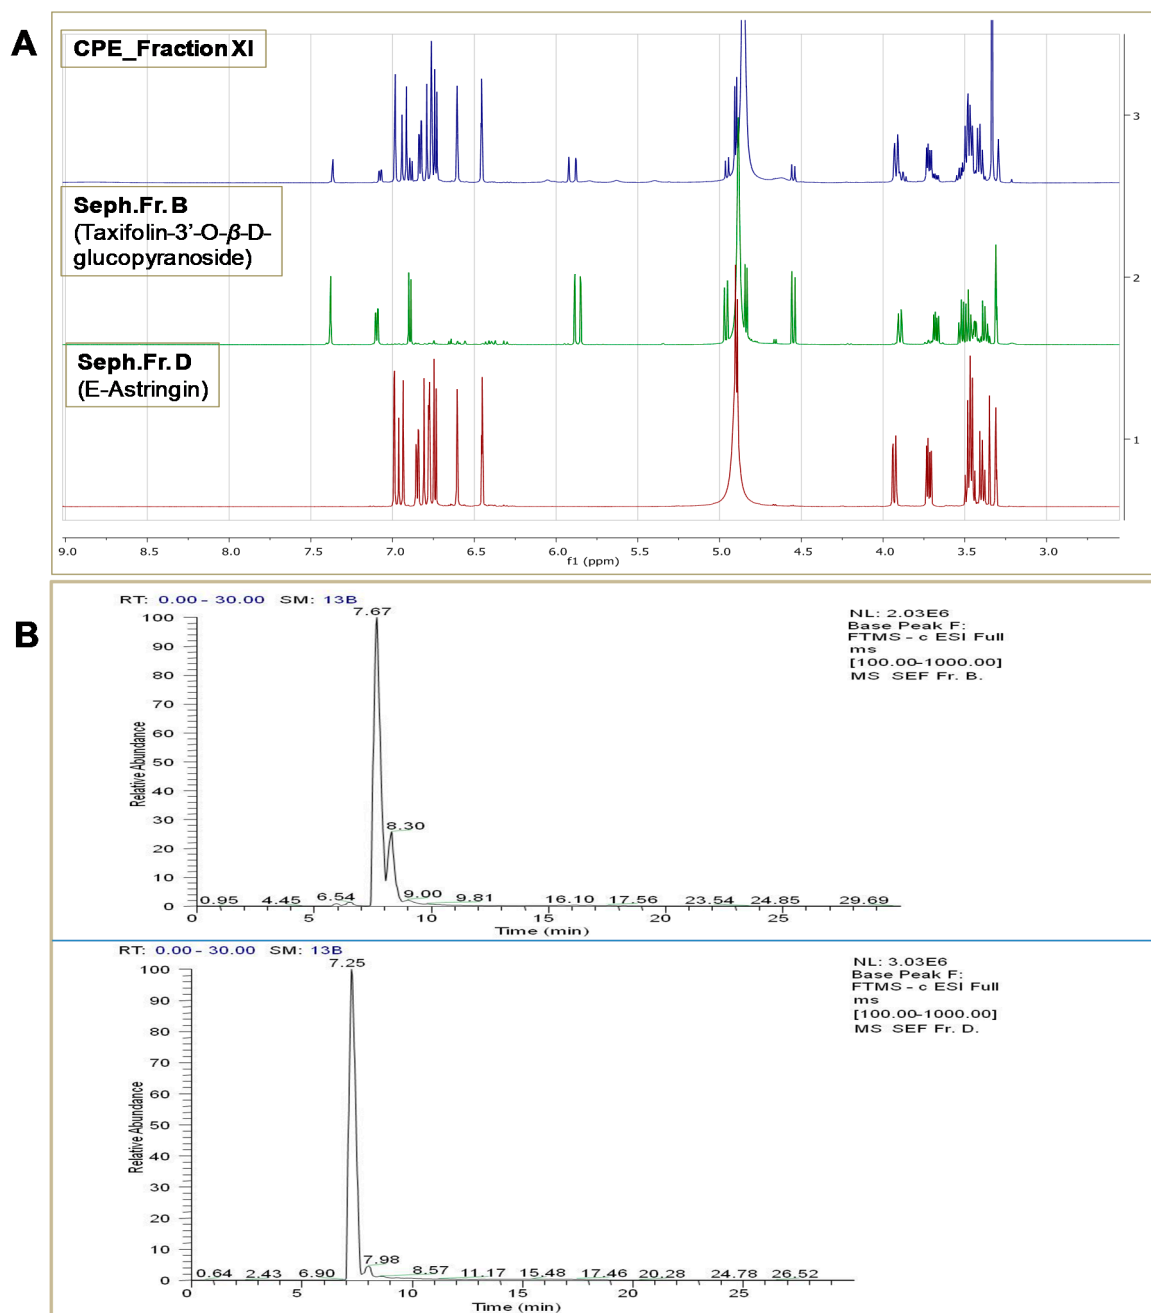

**Figure S2.**  $^1\text{H}$ -NMR spectra (**A**) and LC-ESI(-)-HRMS spectra (**B**) of *E*-astringin and taxifolin-3'-O- $\beta$ -D-glucopyranoside obtained from the analysis of CPC\_Fr. XI by Sephadex LH-20 Column Chromatography

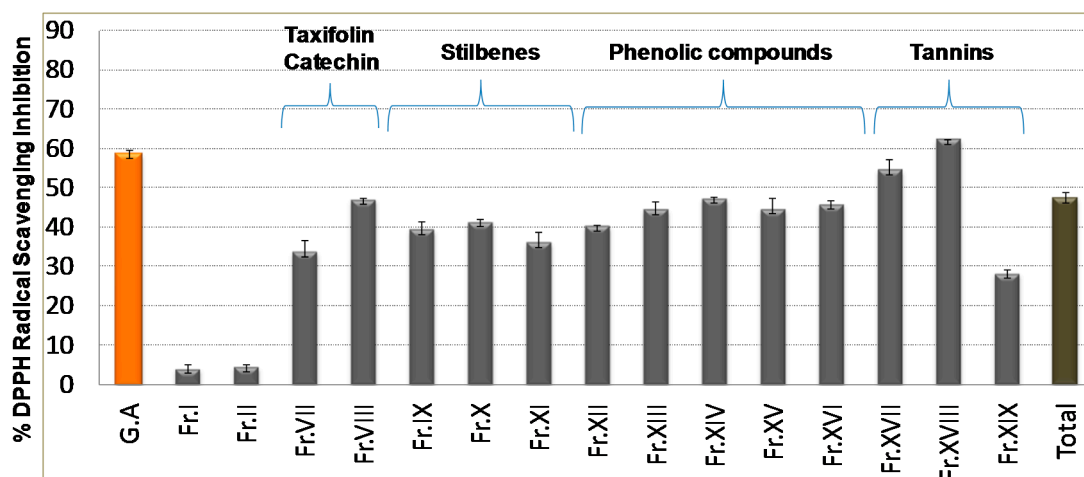

**Figure S3.** % DPPH Inhibition of CPC fractions at 25  $\mu\text{g/mL}$ . GA: Gallic Acid (at 5.0  $\mu\text{g/mL}$ ), Total: Crude Methanolic Extract from bark of *P. abies* (at 25  $\mu\text{g/mL}$ ).

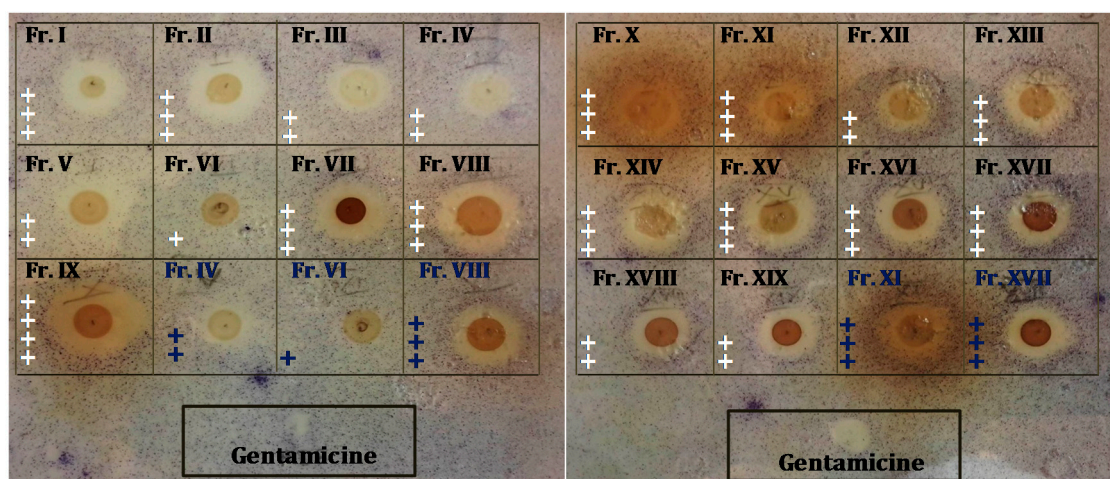

**Figure S4.** Antimicrobial activity of CPC fractions against *Staphylococcus aureus* by using bioautographic method. (+): low activity, (++): middle activity, (+++): high activity, (++++): very high activity). Fractions IV, VI, VIII, XI and XVII were spotted twice in the TLC plate (blue color) in order to verify the accuracy of the method

## ESI(-)-HRMS Spectra of Identified Compounds

CPC\_fr\_II # 1665 RT: 17.92 AV: 1 NL: 1.61E5  
F: FTMS - c ESI Full ms [100.00-1000.00]

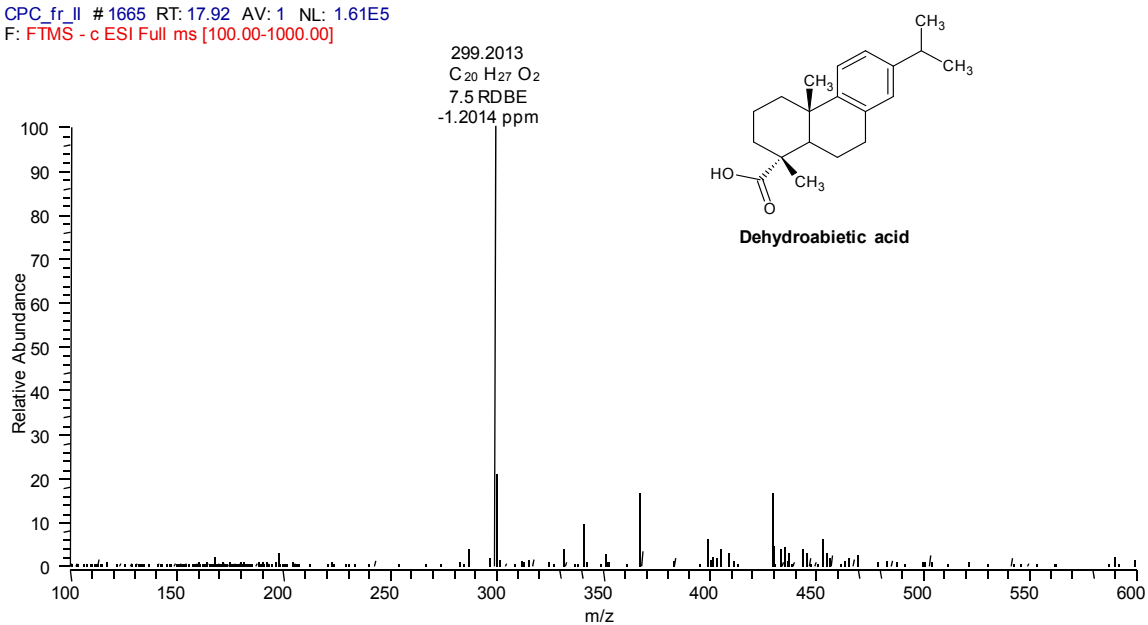

Figure S5. ESI(-)-HRMS spectrum of dehydroabietic acid.

CPC\_fr\_III # 1065 RT: 11.99 AV: 1 NL: 2.34E5  
F: FTMS - c ESI Full ms [100.00-1000.00]

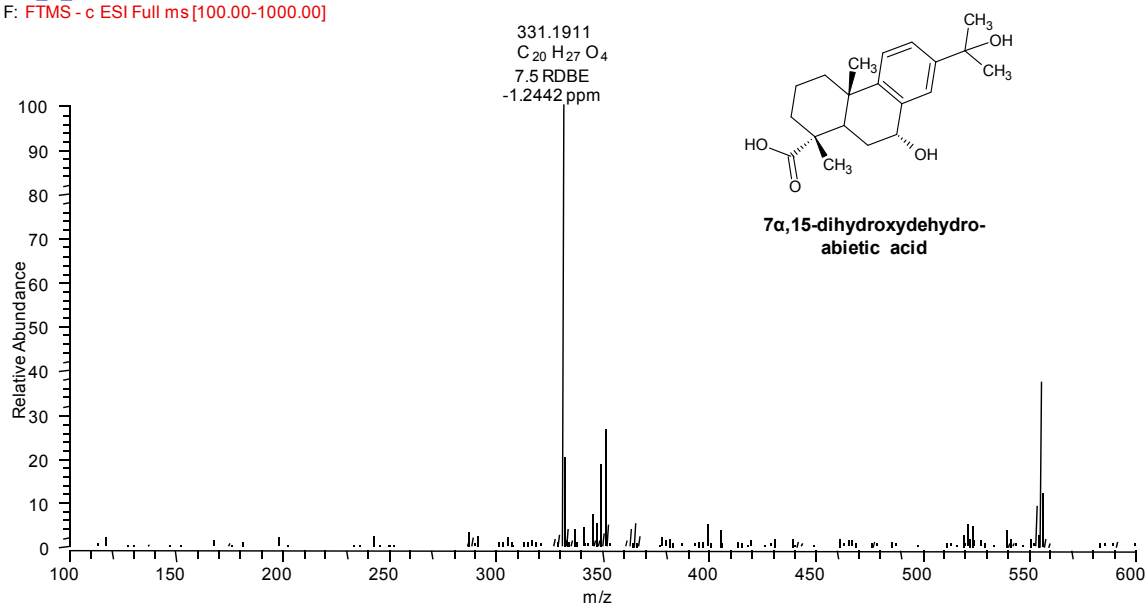

Figure S6. ESI(-)-HRMS spectrum of 7a,15-dihydroxydehydroabietic acid.

CPC\_fr\_VII # 673 RT: 8.14 AV: 1 NL: 5.59E5  
F: FTMS - c ESI Full ms [100.00-1000.00]

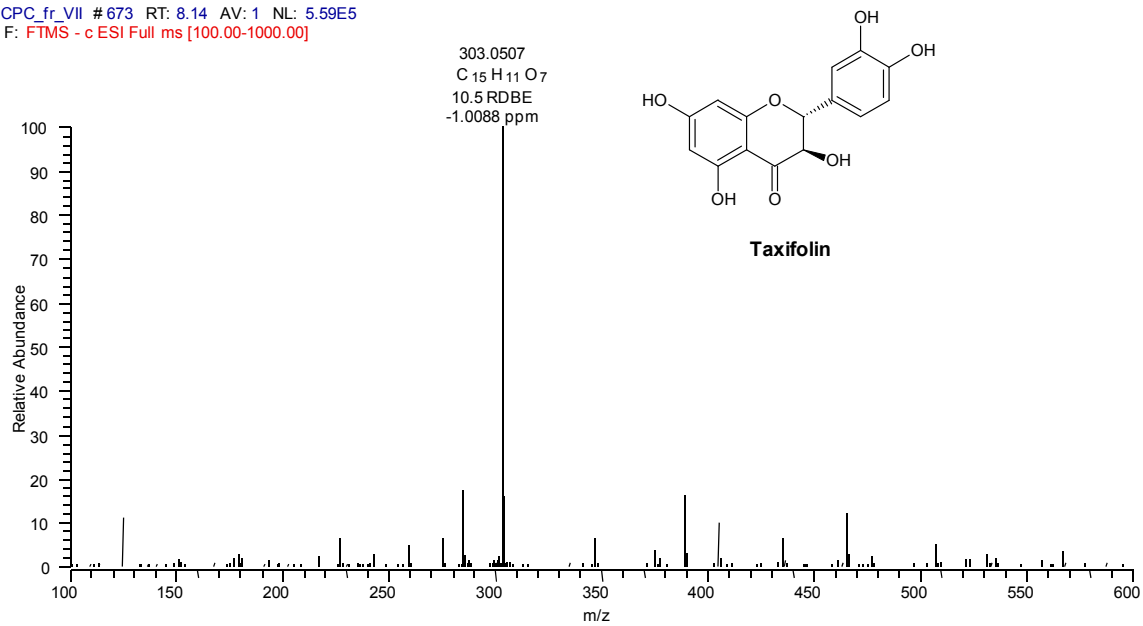

Figure S7. ESI(-)-HRMS spectrum of taxifoline.

CPC\_fr\_VIII # 451 RT: 5.95 AV: 1 NL: 1.08E6  
F: FTMS - c ESI Full ms [100.00-1000.00]

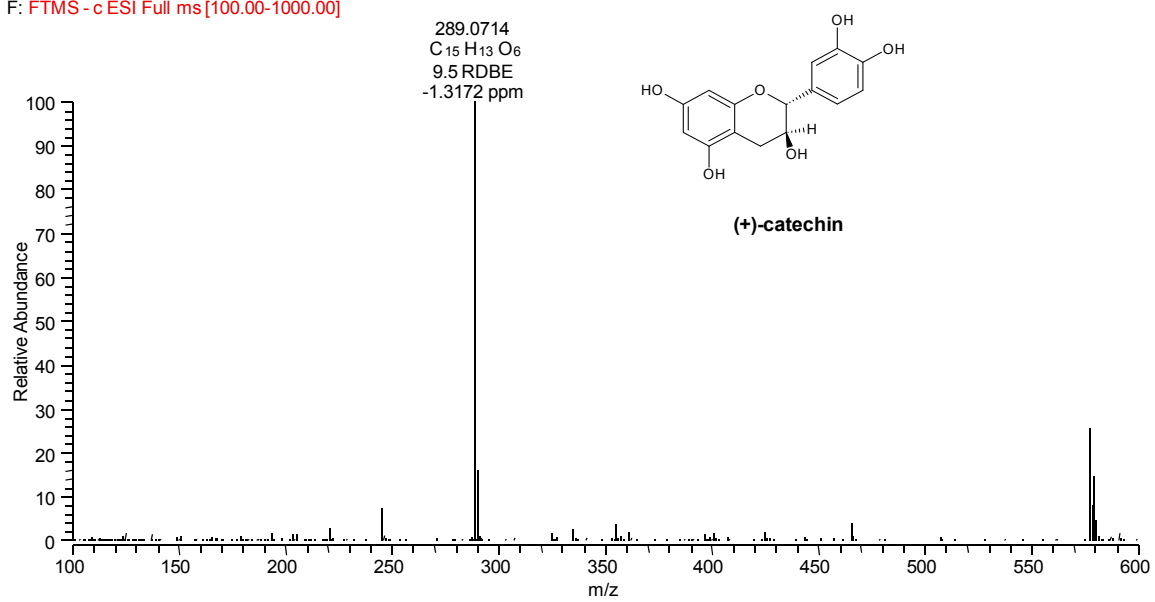

Figure S8. ESI(-)-HRMS spectrum of (+)-catechin.

CPC\_fr\_IX # 653 RT: 7.94 AV: 1 NL: 1.15E6  
F: FTMS - c ESI Full ms [100.00-1000.00]

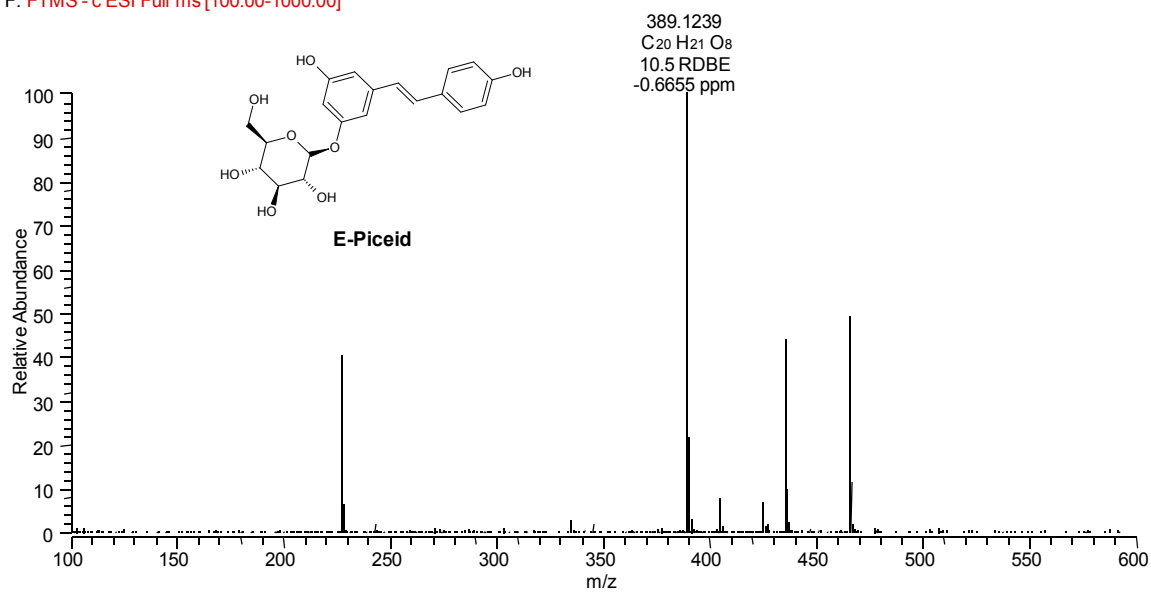

Figure S9. ESI(-)-HRMS spectrum of *E*-piceid.

CPC\_fr\_IX # 687 RT: 8.28 AV: 1 NL: 1.10E6  
F: FTMS - c ESI Full ms [100.00-1000.00]

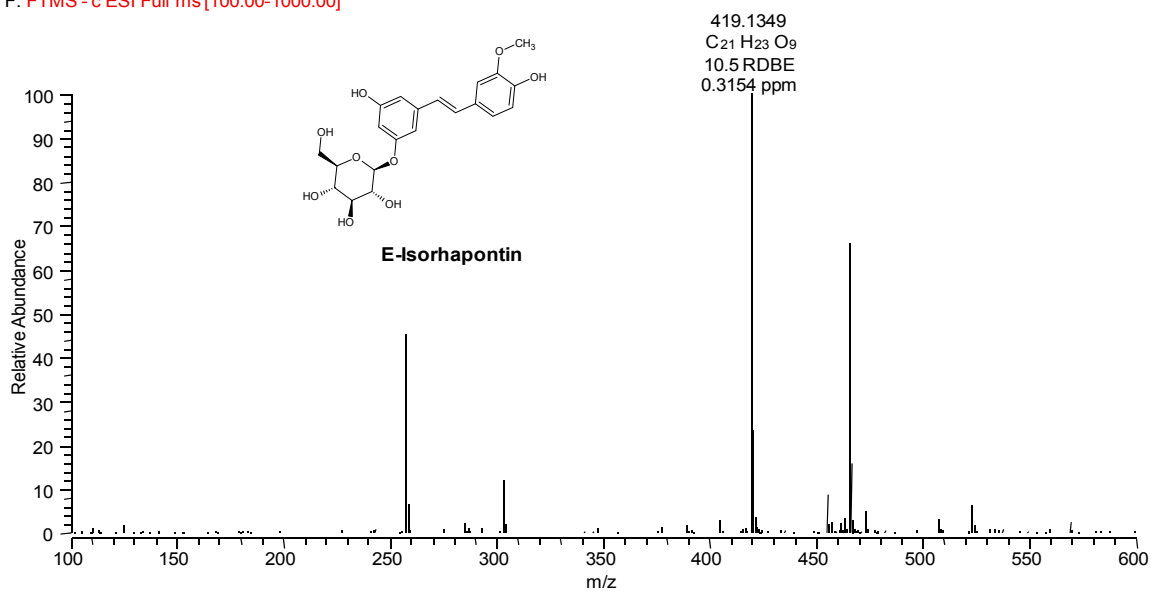

Figure S10. ESI(-)-HRMS spectrum of *E*-isorhapontin.

CPC\_fr\_X # 573 RT: 7.16 AV: 1 NL: 3.77E6  
F: FTMS - c ESI Full ms [100.00-1000.00]

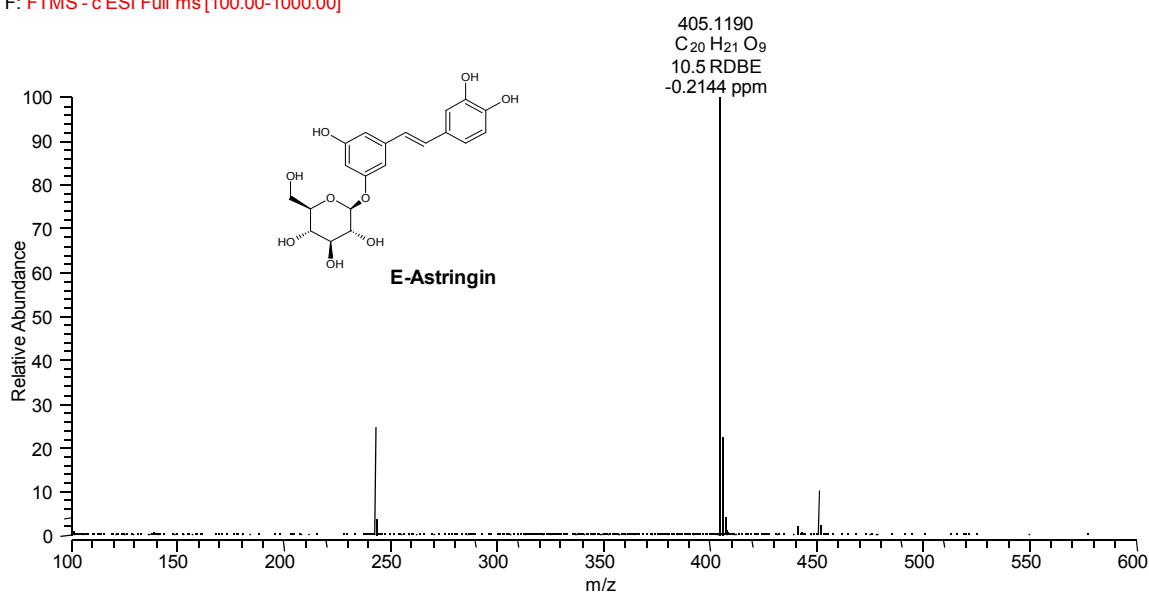

Figure S11. ESI(-)-HRMS spectrum of E-astringin.

CPC\_fr\_XI # 615 RT: 7.57 AV: 1 NL: 3.22E6  
F: FTMS - c ESI Full ms [100.00-1000.00]

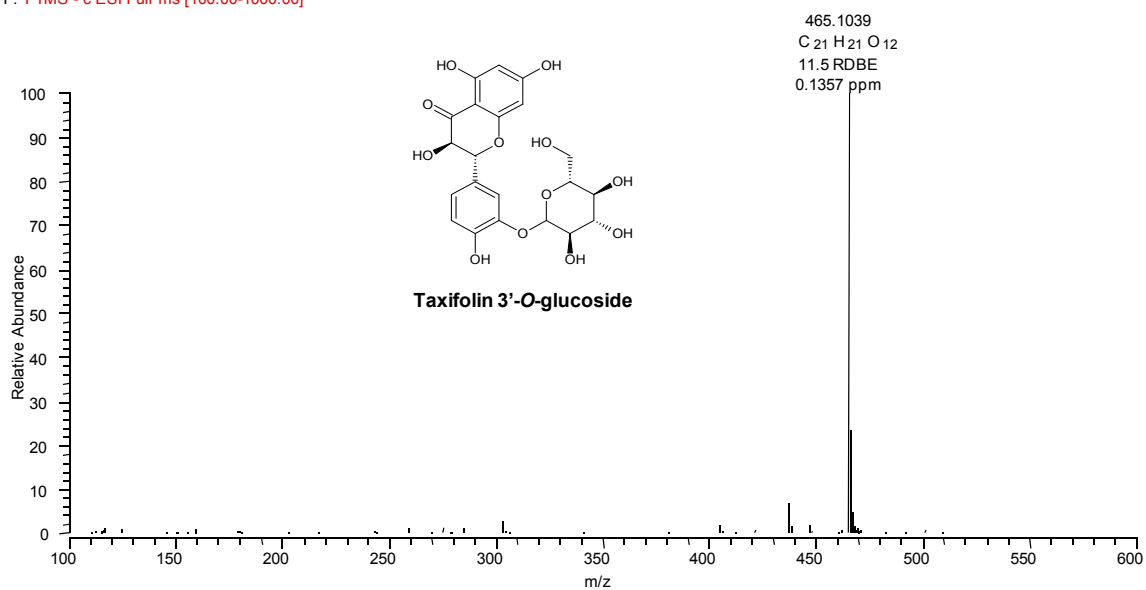

Figure S12. ESI(-)-HRMS spectrum of taxifoline-3'-O-β-D-glucopyranoside.

CPC\_fr\_XV # 375 RT: 5.16 AV:1 NL: 3.97E4  
F: FTMS - c ESI Full ms [100.00-1000.00]

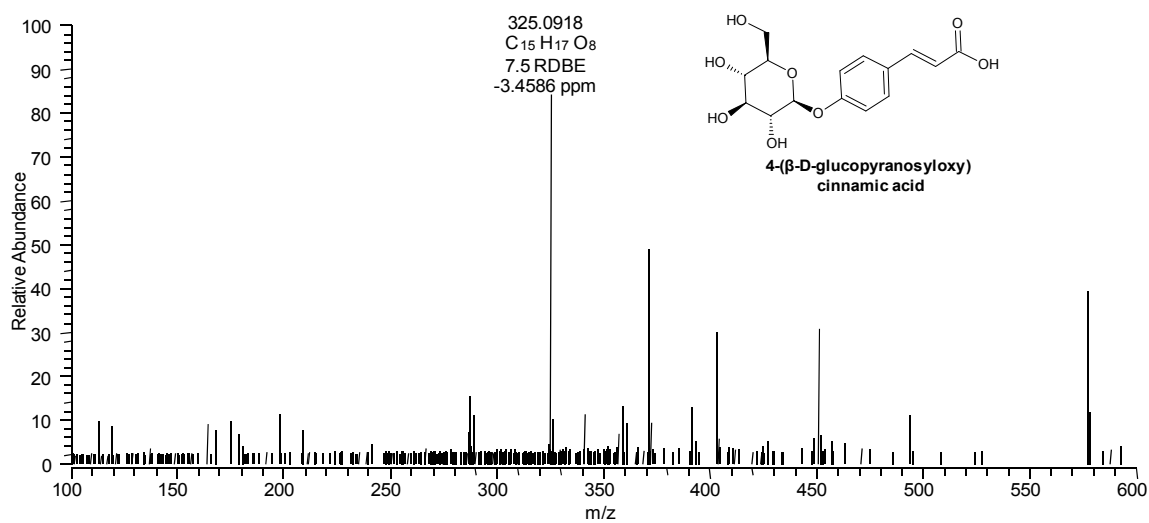

Figure S13. ESI(-)-HRMS spectrum of 4-(β-D-glucopyranosyloxy)cinnamic acid.

CPC\_fr\_X\_V # 459 RT: 6.03 AV:1 NL: 7.33E4  
F: FTMS - c ESI Full ms [100.00-1000.00]

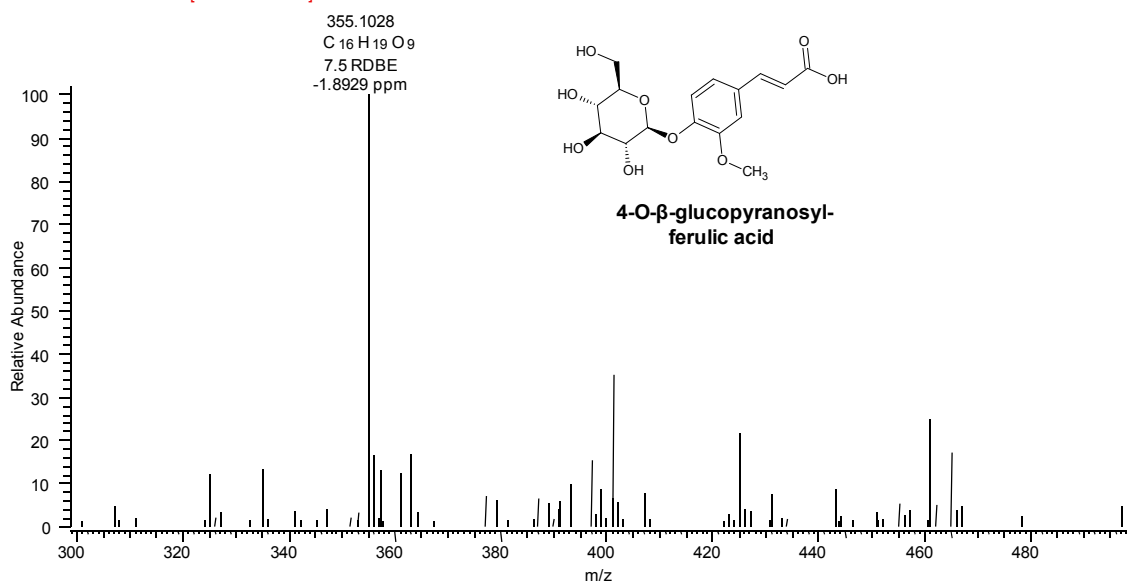

Figure S14. ESI(-)-HRMS spectrum of 4-O-β-glucopyranosyl-ferulic acid.



CPC\_fr\_XV #149 RT: 1.87 AV:1 NL: 4.29E4  
F: FTMS - c ESI Full ms [100.00-1000.00]

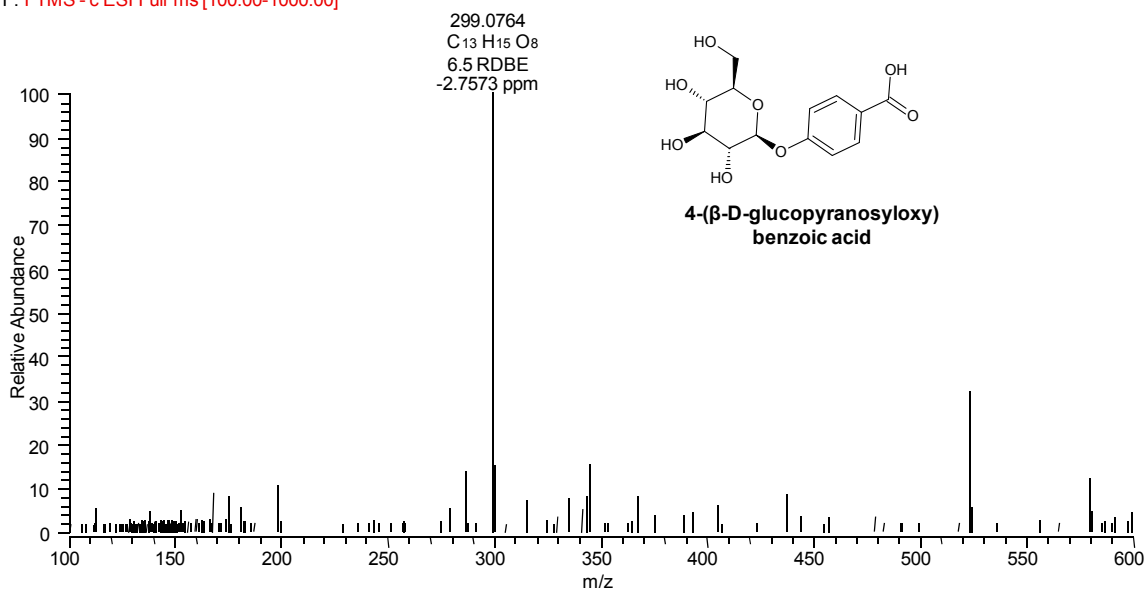

Figure S15. ESI(-)-HRMS spectrum of 4-(β-D-glucopyranosyloxy)benzoic acid.

CPC\_fr\_XVII #42 RT: 0.62 AV:1 NL:1.27E6  
F: FTMS - c ESI Full ms [100.00-1000.00]

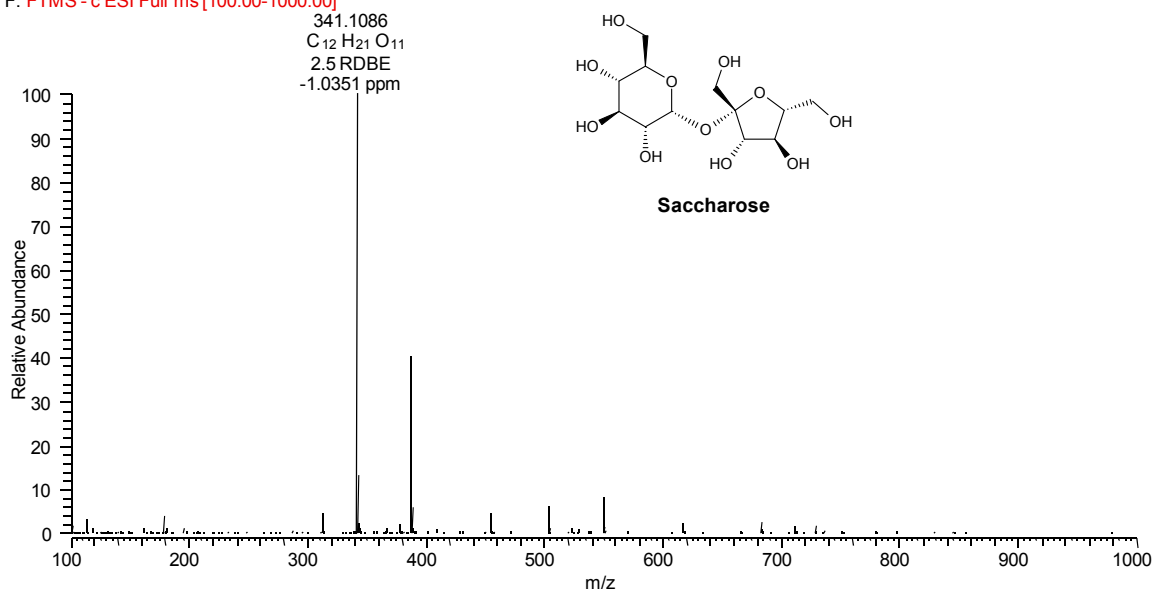

Figure S16. ESI(-)-HRMS spectrum of saccharose.
